# Supplementary material
Source: PubMed Central journal article supplement (PMC6699502)
Supplement: NIHMS1531099-supplement-1.pdf [file NIHMS1531099-supplement-1.pdf]

Appendix  
Results From a Trial of an Online Diabetes Prevention Program Intervention  
Moin et al.

Appendix Figure 1. Omada screen shots.

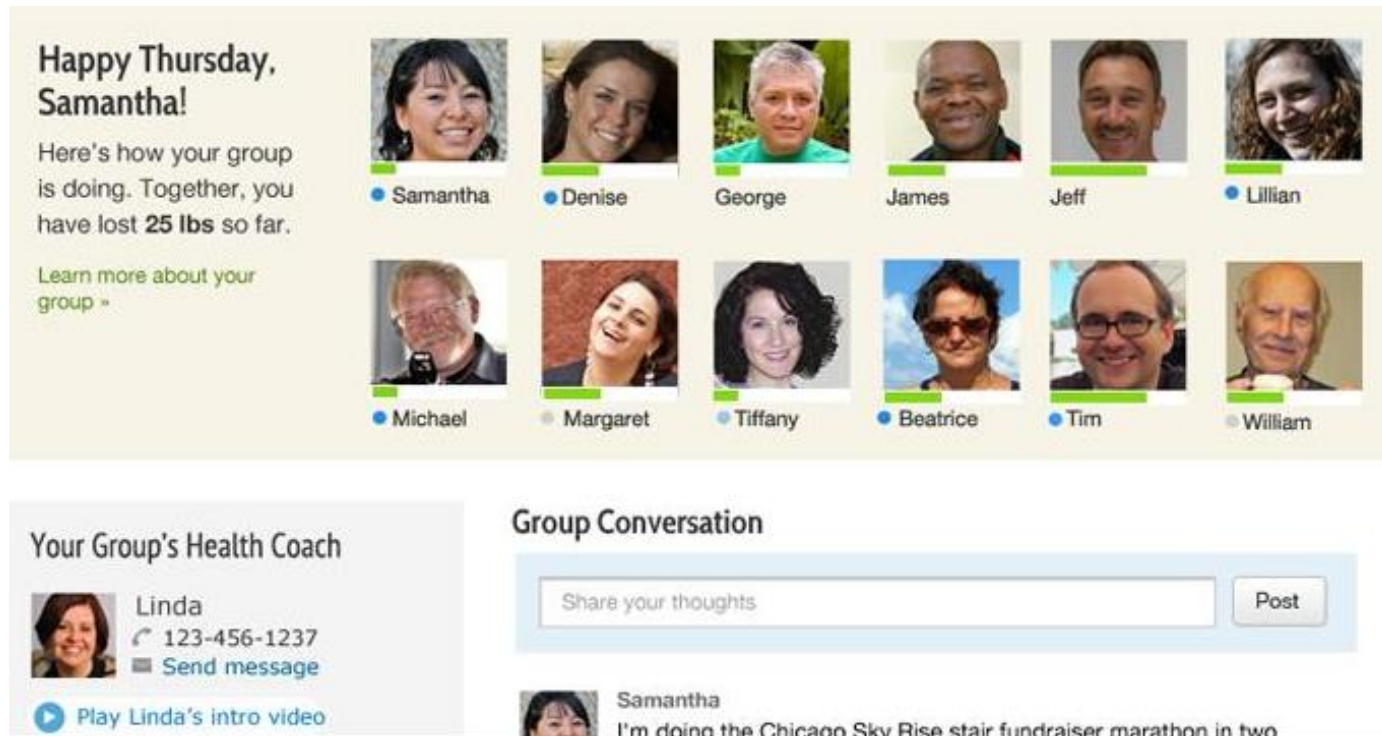

**Appendix**  
**Results From a Trial of an Online Diabetes Prevention Program Intervention**  
**Moin et al.**

**Appendix Table 1.** Comparison of Intervention Components Between Online DPP, In-person DPP (VA-DPP), and MOVE!<sup>17</sup>

| <b>Program features</b> | <b>Online DPP<sup>a</sup></b>                                                                                                                                                                                                                               | <b>In-person DPP (VA-DPP)</b>                                                                                                                     | <b>MOVE!</b>                                                                                                                                                                       |
|-------------------------|-------------------------------------------------------------------------------------------------------------------------------------------------------------------------------------------------------------------------------------------------------------|---------------------------------------------------------------------------------------------------------------------------------------------------|------------------------------------------------------------------------------------------------------------------------------------------------------------------------------------|
| Program theory          | Established in 2010 as an online adaptation of the DPP intensive lifestyle intervention; follows the CDC National DPP framework                                                                                                                             | Established in 2012 as a group based adaptation of the DPP intensive lifestyle intervention; follows the CDC National DPP framework <sup>14</sup> | Established in 2004 based on the 1998 NIH evidence review, the 2000 Practical Guide, and the USPSTF clinical guidelines for screening and interventions for obesity. <sup>51</sup> |
| Program goals           | Generic goals of 7% weight loss and 150 minutes of moderate physical activity to prevent diabetes                                                                                                                                                           | Generic goals of 7% weight loss and 150 minutes of moderate physical activity to prevent diabetes                                                 | Patients create own goals to lose weight                                                                                                                                           |
| Delivery                | Closed web-based cohort with a single coach                                                                                                                                                                                                                 | Closed cohort with a single coach                                                                                                                 | Open and closed cohorts groups, with rotating coaches                                                                                                                              |
| Coaches                 | Trained by DTTAC-certified Master Trainer for national DPP lifestyle health coaching; background in nutrition, exercise physiology, nursing, or behavior modification. Minimum bachelor's degree; many have master's or special credentials (e.g., RD, RN). | Completed Group Lifestyle Balance (GLB) CDC-certification for DPP delivery and had a background in nutrition (e.g., RD)                           | Multidisciplinary team of providers (e.g., dietitian, health psychologist)                                                                                                         |
| Intensity               | 16 core weekly for first 4 months then weekly maintenance sessions for 8 months                                                                                                                                                                             | 16 core weekly then biweekly sessions in first 6 months followed by 6 monthly maintenance sessions in second 6 months                             | 8–12 core weekly sessions followed by monthly maintenance sessions                                                                                                                 |
| Group assignments       | Grouped by region/geographic proximity and timing of acceptance                                                                                                                                                                                             | Systematic assignment based on MOVE! class orientation date                                                                                       |                                                                                                                                                                                    |

<sup>a</sup>Online DPP designed and delivered by Omada Health.

VA-DPP, Veterans Affairs Diabetes Prevention Program; MOVE!, VA's standard of care weight loss program; RD, Registered Dietician; CDC, Centers for Disease Control and Prevention; USPSTF, U.S. Preventive Services Task Force; DTTAC, Diabetes Training and Technical Assistance Center; RN, registered nurse.

**Appendix**  
**Results From a Trial of an Online Diabetes Prevention Program Intervention**  
**Moin et al.**

**Appendix Table 2.** Baseline Characteristics of Online DPP Participants

| Characteristic                     | A<br>Consented<br>N=268 | B<br>2+ weights from<br>wireless scale<br>N=172 | C<br>2+ weights obtained<br>from EMR<br>N=70 | D<br>No weights<br>available<br>N=26 | <i>p</i> -<br>value<br>B vs<br>C | <i>p</i> -<br>value<br>B+C<br>vs D |
|------------------------------------|-------------------------|-------------------------------------------------|----------------------------------------------|--------------------------------------|----------------------------------|------------------------------------|
| Female, n (%)                      | 82 (30.6)               | 63 (36.6)                                       | 13 (18.6)                                    | 6 (23.1)                             | <b>0.006</b>                     | 0.38                               |
| Age, years, mean (SD)              | 60.3 (11.3)             | 60.1 (10.8)                                     | 60.0 (12.6)                                  | 62.7 (11.2)                          | 0.93                             | 0.26                               |
| Weight, kg, mean (SD)              | 98.5 (18.7)             | 99.5 (19.3)                                     | 96.4 (17.6)                                  | 94.5 (6.6)                           | 0.26                             | 0.67                               |
| BMI, kg/m <sup>2</sup> , mean (SD) | 32.6 (5.5)              | 33.3 (5.6)                                      | 31.2 (5.1)                                   | 31.6 (3.3)                           | <b>0.007</b>                     | 0.70                               |
| Ethnicity, n (%) <sup>a</sup>      |                         |                                                 |                                              |                                      |                                  |                                    |
| Hispanic                           | 31 (11.6)               | 21 (12.2)                                       | 9 (12.9)                                     | 1 (4.0)                              | 0.89                             | 0.21                               |
| Race, n (%) <sup>a</sup>           |                         |                                                 |                                              |                                      | <b>0.006</b>                     | 0.18                               |
| Black                              | 65 (24.3)               | 32 (18.6)                                       | 26 (37.1)                                    | 7 (26.9)                             |                                  |                                    |
| White                              | 191 (71.3)              | 133 (77.3)                                      | 40 (57.1)                                    | 18 (69.2)                            |                                  |                                    |
| Other                              | 10 (3.7)                | 7 (4.1)                                         | 3 (4.3)                                      | 0 (0.0)                              |                                  |                                    |
| Missing                            | 2 (0.7)                 | 0 (0.0)                                         | 1 (1.4)                                      | 1 (3.8)                              |                                  |                                    |
| Comorbidities, n (%)               |                         |                                                 |                                              |                                      |                                  |                                    |
| HTN                                | 175 (65.3)              | 112 (65.1)                                      | 48 (68.6)                                    | 15 (57.7)                            | 0.61                             | 0.39                               |
| CAD                                | 33 (12.3)               | 19 (11.0)                                       | 11 (15.7)                                    | 3 (11.5)                             | 0.32                             | 0.90                               |
| Mental health                      | 120 (44.8)              | 73 (42.4)                                       | 36 (51.4)                                    | 11 (42.3)                            | 0.20                             | 0.79                               |
| HbA1c %, mean (SD) <sup>b</sup>    | 6.0 (0.2)               | 6.0 (0.2)                                       | 6.0 (0.3)                                    | 6.0 (0.2)                            | 0.85                             | 0.39                               |

*Notes:* Boldface indicates statistical significance ( $p < 0.05$ ). A=All participants who consented to participate in Online DPP=268=B+C+D; B=Online DPP participants who uploaded at least 2 weights using their wireless scale; included in ITT analysis=170; C=Online DPP participants who did not upload any weights from their wireless scale. Weights were extracted from EMR data; included in ITT analysis=72; D=Online DPP participants who did not have any weights available from wireless scale or EMR; excluded from ITT analysis=26.

<sup>a</sup> 22 missing values.

<sup>b</sup> 11 had baseline A1c <5.7% and 6 had baseline A1c >6.4%.

DPP, Diabetes Prevention Program; EMR, electronic medical record; HTN, hypertension; CAD, coronary heart disease; ITT, intention-to-treat.

Appendix  
Results From a Trial of an Online Diabetes Prevention Program Intervention  
Moin et al.

Appendix Figure 2. Weight loss outcomes for online participants (n=248) at 12 months.

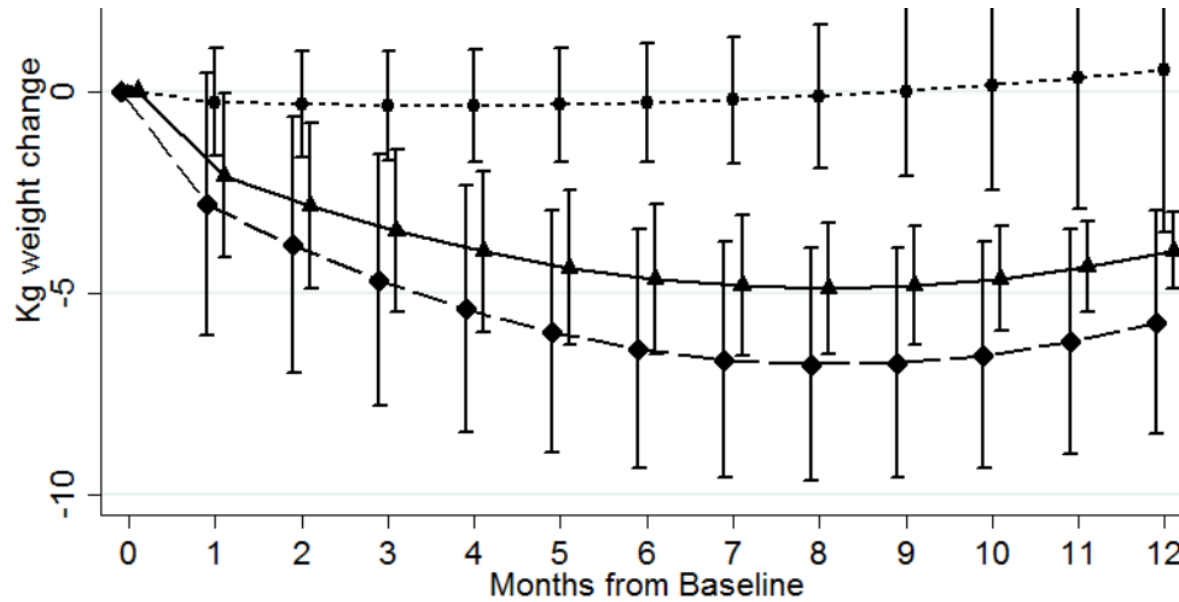

- = Online DPP Non-Completers ( $\geq 2$  EMR weight assessments).
- ◆- = Online DPP Completers ( $\geq 2$  online weight assessments).
- ▲— = Online DPP Completers + Non-Completers ( $\geq 2$  EMR or online weight assessments)

DPP, Diabetes Prevention Program; EMR, electronic medical record.

**Appendix  
Results From a Trial of an Online Diabetes Prevention Program Intervention  
Moin et al.**

**Appendix Figure 3.** CONSORT flow for three-arm comparative analysis.

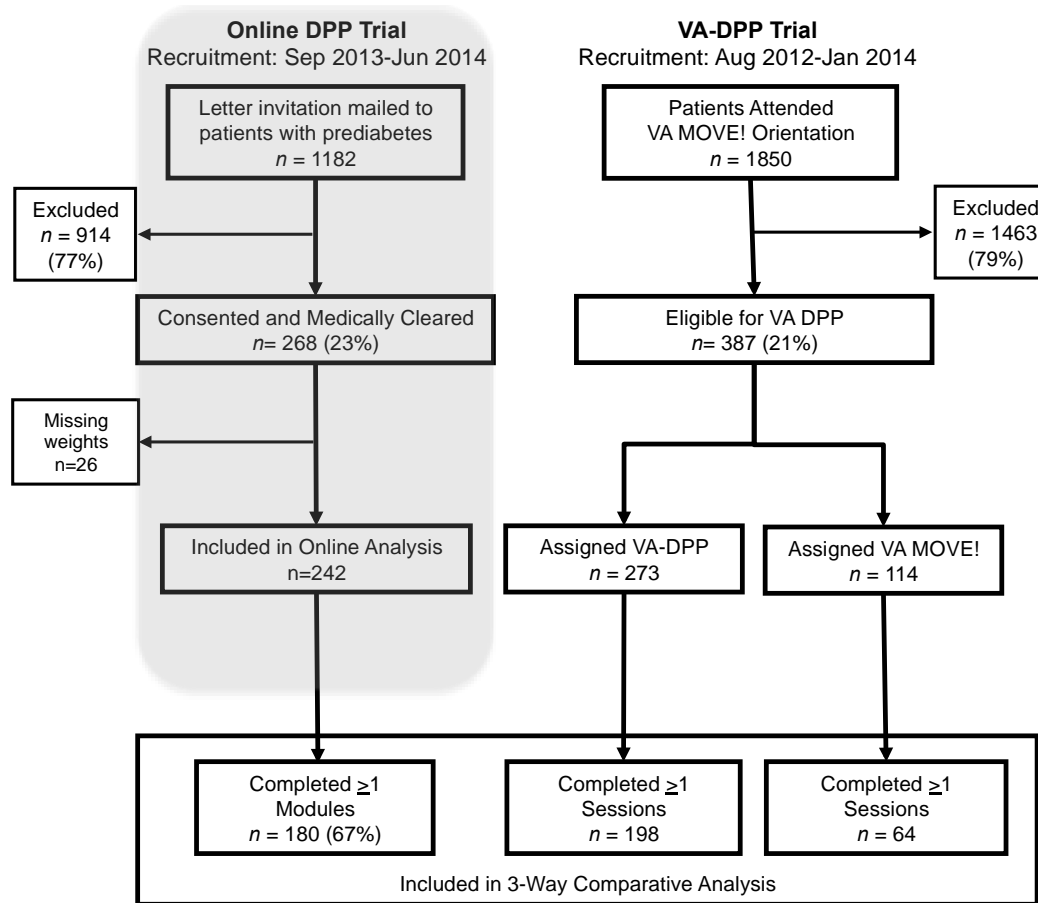

Legend: Shaded box represents data included in the primary online DPP analysis. VA-DPP= VA Diabetes Prevention Program. Diabetes was defined by HbA1c>6.4% or FPG>125 mg/dL, diabetes medications or diagnosis.

**Appendix**  
**Results From a Trial of an Online Diabetes Prevention Program Intervention**  
**Moin et al.**

**Appendix Table 3.** Baseline Characteristics of Participants Who Completed 1+ Modules/Sessions Across Three Arms

| Characteristic                     | Online DPP<br>1+ session<br>N=180 | In-person DPP<br>1+ session<br>N=198 | MOVE!<br>1+ session<br>N=64 | <i>p</i> -value  |
|------------------------------------|-----------------------------------|--------------------------------------|-----------------------------|------------------|
| Female, n (%)                      | 64 (35.6)                         | 26 (13.1)                            | 4 (6.3)                     | <b>&lt;0.001</b> |
| Age, years, mean (SD)              | 60.2 (10.6)                       | 59.2 (8.9)                           | 60.5 (9.1)                  | 0.50             |
| Weight, kg, mean (SD)              | 99.5 (19.3)                       | 110.2 (20.1)                         | 105.3 (18.5)                | <b>&lt;0.001</b> |
| BMI, kg/m <sup>2</sup> , mean (SD) | 33.3 (5.6)                        | 35.4 (5.5)                           | 33.9 (4.6)                  | <b>&lt;0.001</b> |
| Ethnicity, n (%)                   |                                   |                                      |                             |                  |
| Hispanic                           | 21 (11.7)                         | 7 (3.5)                              | 6 (9.2)                     | 0.01             |
| Race, n (%) <sup>a</sup>           |                                   |                                      |                             |                  |
| Black                              | 33 (18.3)                         | 80 (40.4)                            | 26 (40.6)                   | <b>&lt;0.001</b> |
| White                              | 140 (77.8)                        | 103 (52.0)                           | 30 (46.9)                   |                  |
| Other                              | 7 (3.9)                           | 5 (2.5)                              | 1 (1.6)                     |                  |
| Missing                            | 0 (0.0)                           | 10 (5.1)                             | 7 (10.9)                    |                  |
| Comorbidities, n (%)               |                                   |                                      |                             |                  |
| HTN                                | 116 (64.4)                        | 134 (67.7)                           | 46 (71.9)                   | 0.53             |
| CAD                                | 20 (11.1)                         | 26 (13.1)                            | 10 (15.6)                   | 0.63             |
| Mental health <sup>b</sup>         | 78 (43.3)                         | 105 (53.0)                           | 31 (48.4)                   | 0.17             |
| HbA1c %, mean (SD) <sup>c</sup>    | 6.0 (0.2)                         | 6.0 (0.2)                            | 6.0 (0.2)                   | 0.28             |

*Note:* Boldface indicates statistical significance ( $p < 0.05$ ).

<sup>a</sup>Data on race and ethnicity were obtained from either CDW or self-report. Self-report or CDW status of Hispanic ethnicity was categorized before race (if identified as Hispanic ethnicity, no racial category was assigned).

<sup>b</sup>Includes: Post-traumatic stress disorder (PTSD), depression, schizophrenia, bipolar, and anxiety.

<sup>c</sup> 8 had a1c <5.7 and 9 had a1c >6.4.

VA-DPP, VA Diabetes Prevention Program; HTN, hypertension; CAD, coronary heart disease; CDW, Corporate data warehouse.

Appendix  
Results From a Trial of an Online Diabetes Prevention Program Intervention  
Moin et al.

**Appendix Figure 4.** Weight loss outcomes for participants completing  $\geq 1$  session/module in online DPP, in-person DPP, and MOVE! at 12 months using weighted model.

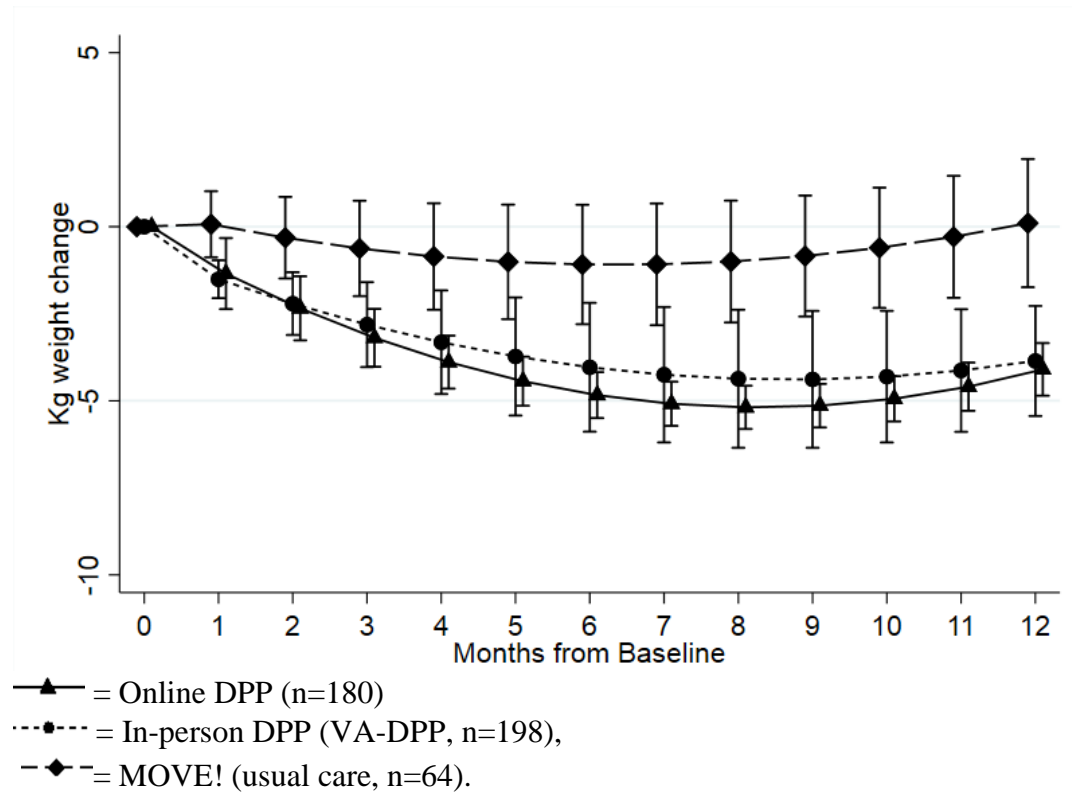

DPP, Diabetes Prevention Program.
